# Supplementary material
Source: Research Square preprint supplement (doi:10.21203/rs.3.rs-9223706/v1)
Supplement: Supplementary file 1 [file e694d787cbba58c7ef3f59f5.docx]

**Table 2.** Summary of the statistical models (regional city scale: Models 1–6, local site scale: Models 7–12) linking visitation rates (response variables in column) to land use characteristics (explanatory variables in line). The density of UGS patches corresponds to the number of UGS patches per hectare at the city (regional) scale and to the number of UGS in a 500m radius around the experimental site at the site (local) scale. Symbols and colors indicate significance and direction of effects on response variables: (*): p < 0.1; *: p < 0.05; **: p < 0.01; ***: p < 0.001; Green cells = significant positive effect; Red = significant negative effect; grey = not significant; (NE): effect not evaluated at that scale. For full model statistics, see Tables S3a (regional) and S3b (local).

**Table 3.** Summary statistics of the models linking mean fruit set to (13) the number of morphogroups and the visitation rate of all morphogroups; (14) each morphogroup visitation rate. Numbers refer to each model’s structure (see Table 1). Control fruits refer to the percentage of flowers that produced fruits on the control plants. Total number of observations n = 295.

| **Models** | **Estimate (± SE)** | **z-value** | **p-value** |
| --- | --- | --- | --- |
| **(13). Effect of the number of morphogroups and total visitation rate**  Number of morphogroups visiting the plants  Visitation rate, all morphogroups  Control fruits  Number of inflorescences | 0.015 (0.007)  0.0002 (0.00006)  0.66 (0.08)  0.001 (0.003) | 1.56  2.42  8.74  0.46 | 0.12  **0.016**  **<0.0001**  0.65 |
| **(14). Effect of visits per morphogroup**  Visitation rate, small wild bees  Visitation rate, large wild bees  Visitation rate, honeybees  Visitation rate, bumblebees  Visitation rate, hoverflies  Control fruits | 0.00042 (0.00016)  0.00039 (0.00024)  0.00013 (0.00019)  0.00023 (0.00015)  0.00006 (0.00009)  0.66 (0.07) | 2.66  1.63  0.64  2.57  0.66  9.09 | **0.008**  0.10  0.52  0.12  0.51  **<0.0001** |

**Table 4.** Summary statistics of the models linking the mean number of seeds per fruit to the number of morphogroups (model 15) and the visitation rate of all morphogroups; and to each morphogroup visitation rate (model 16). See Table 1 for model description and parameterization. Total number of observations n = 277.

| **Models** | **Estimate (± SE)** | **z-value** | **p-value** |
| --- | --- | --- | --- |
| **(15). Effect of the number of morphogroups and total visitation rate**  Number of morphogroups visiting the plants  Visitation rate, all morphogroups  Control fruits  Number of inflorescences | 0.0075 (0.03)  0.0006 (0.0002)  1.38 (0.29)  -0.001 (0.012) | 0.25  2.71  4.78  -0.1 | 0.80  **0.007**  **<0.0001**  0.92 |
| **(16). Effect of visits per morphogroup**  Visitation rate, small wild bees  Visitation rate, large wild bees  Visitation rate, honeybees  Visitation rate, bumblebees  Visitation rate, hoverflies  Control fruits | 0.0015 (0.0006)  0.0006 (0.0009)  0.0003 (0.0007)  0.0007 (0.0005)  0.0002 (0.0003)  1.26 (0.28) | 2.72  0.72  0.34  1.31  0.70  4.46 | **0.006**  0.47  0.73  0.18  0.48  **<0.0001** |
